# Supplementary material for: Association between one-carbon metabolism indices and DNA methylation status in maternal and cord blood
Source: PubMed Central journal article supplement (PMC6237996; doi:10.1038/s41598-018-35111-1), 2018-11-15
Supplement: 41598_2018_35111_MOESM1_ESM.pdf [file 41598_2018_35111_MOESM1_ESM.pdf]

**Association between one-carbon metabolism indices and DNA methylation status in maternal and cord blood**

Anna K. Knight<sup>1\*</sup>, Hea Jin Park<sup>2\*</sup>, Dorothy B. Hausman<sup>2</sup>, Jennifer M. Fleming<sup>2</sup>, Victoria L. Bland<sup>2</sup>, Gisselle Rosa<sup>2</sup>, Elizabeth M. Kennedy<sup>3</sup>, Marie A. Caudill<sup>4</sup>, Olga Malysheva<sup>4</sup>, Gail PA. Kauwell<sup>5</sup>, Andrew Sokolow<sup>5</sup>, Susan Fisher<sup>6</sup>, Alicia K. Smith<sup>1,7</sup>, Lynn B. Bailey<sup>2</sup>

<sup>1</sup>Genetics and Molecular Biology Program, Emory University, Atlanta, GA, USA

<sup>2</sup>Department of Foods and Nutrition, University of Georgia, Athens, GA, USA

<sup>3</sup>Department of Environmental Health, Rollins School of Public Health, Emory University, Atlanta, Georgia, USA

<sup>4</sup>Division of Nutritional Sciences, Cornell University, Ithaca, NY, USA

<sup>5</sup>Food Science and Human Nutrition Department, University of Florida, Gainesville, FL, USA

Piedmont Athens Regional Midwifery, Athens, GA, USA

<sup>7</sup>Gynecology and Obstetrics, Emory University School of Medicine, Atlanta, GA, USA

\* Co-first authors; these authors contributed equally.

**Corresponding author:**

Alicia K. Smith, PhD

Associate Professor

Gynecology and Obstetrics

Emory University SOM

101 Woodruff Circle NE; Ste 4217

Atlanta, GA 30322

Phone: 404-778-2005

Fax: 404-727-3233

[alicia.smith@emory.edu](mailto:alicia.smith@emory.edu)

Supplemental Table 1: Metabolite concentrations at each sampling point.

| Metabolite   | Baseline      |              |    |              | 40 weeks      |    |             |              | Cord blood |  |
|--------------|---------------|--------------|----|--------------|---------------|----|-------------|--------------|------------|--|
|              | Range         | Mean ± SD    | N  | Range        | Mean ± SD     | N  | Range       | Mean ± SD    | N          |  |
| 5mTHF        | 7.29-47.21    | 25.06±12.83  | 24 | 10.91-49.59  | 30.86 ±10.57  | 24 | 16.83-69.48 | 39.14±11.98  | 24         |  |
| Betaine      | 12.06-33.26   | 20.99±5.80   | 24 | 6.34-16.24   | 11.18 ±2.53   | 22 | 15.26-37.06 | 22.71±5.35   | 22         |  |
| Choline      | 3.85-9.46     | 6.31±1.54    | 24 | 6.34-11.79   | 8.44 ±1.35    | 22 | 17.49-69.83 | 32.58±14.10  | 22         |  |
| DMG          | .95-5.17      | 2.05±1.16    | 24 | .88-2.39     | 1.57 ± .40    | 22 | 1.49-20.50  | 3.11±4.13    | 22         |  |
| Homocysteine | 3.19-9.50     | 5.55±1.72    | 24 | 3.10-8.82    | 4.91 ± 1.74   | 22 | 2.65-6.55   | 4.30±1.22    | 22         |  |
| Methionine   | 16.30-40.21   | 22.58±6.39   | 24 | 15.80-37.52  | 24.47 ±5.66   | 22 | 31.03-55.76 | 41.06±6.16   | 22         |  |
| RBCFolate    | 210.3-1860.0  | 1146±480.07  | 24 | 1336-5095    | 2216 ±877.56  | 23 | 755-2765    | 1852±609.45  | 23         |  |
| SAH          | 2.85-9.79     | 5.98±2.06    | 24 | 1.48-14.37   | 8.58 ±3.26    | 24 | 11.25-53.32 | 24.55±10.93  | 22         |  |
| SAM          | 32.100-147.50 | 66.26±28.73  | 24 | 38.62-152.30 | 82.76 ±28.56  | 24 | 106.2-286.8 | 187.3±51.60  | 22         |  |
| SAM/SAH      | 5.984-47.21   | 25.06±3.65   | 24 | 3.10-27.86   | 11.06 ±5.40   | 24 | 3.69-17.08  | 8.77±3.64    | 22         |  |
| SerumFolate  | 15.70-122.50  | 59.47±32.25  | 24 | 24.20-110.40 | 71.10 ±23.60  | 24 | 36-139.30   | 86.54±26.33  | 23         |  |
| TMOA         | .53-94.84     | 5.61±19.45   | 24 | .51-33.66    | 3.04 ±6.88    | 22 | .64-31.10   | 3.13±6.65    | 22         |  |
| Vitamin B12  | 156.3-792.9   | 435.3±144.34 | 24 | 119.5-594.6  | 313.8 ±132.97 | 24 | 154.6-1682  | 689.2±320.96 | 23         |  |

**Supplemental Table 2: Correlated CpG sites between maternal methylation at delivery and cord blood methylation.**

| CpG Site      | Gene             | Chromosome | T value | R2   | P-val    | FDR      |
|---------------|------------------|------------|---------|------|----------|----------|
| cg16970850    | <i>PINX1</i>     | 8          | 13.41   | 0.93 | 9.35E-10 | 4.24E-04 |
| cg13453244    |                  | 8          | 10.75   | 0.90 | 1.92E-08 | 2.90E-03 |
| cg20425384    |                  | 12         | 10.87   | 0.91 | 1.65E-08 | 2.90E-03 |
| cg19252607    | <i>BRD1</i>      | 22         | 10.40   | 0.93 | 2.98E-08 | 3.38E-03 |
| cg02909570    |                  | 16         | 10.16   | 0.89 | 4.04E-08 | 3.56E-03 |
| cg19322825    |                  | 7          | 10.04   | 0.88 | 4.71E-08 | 3.56E-03 |
| cg10410513    | <i>ARHGEF10</i>  | 8          | 9.64    | 0.88 | 8.08E-08 | 5.24E-03 |
| cg09333221    |                  | 7          | 9.44    | 0.89 | 1.06E-07 | 6.04E-03 |
| cg01733928    |                  | 14         | 9.29    | 0.88 | 1.30E-07 | 6.04E-03 |
| cg22561794    | <i>BTNL8</i>     | 5          | 9.28    | 0.88 | 1.33E-07 | 6.04E-03 |
| cg14240634    | <i>FBRSL1</i>    | 12         | 9.17    | 0.89 | 1.53E-07 | 6.33E-03 |
| cg24014990    | <i>VASH1</i>     | 14         | 9.02    | 0.88 | 1.90E-07 | 6.81E-03 |
| cg27454698    |                  | 12         | 9.00    | 0.89 | 1.95E-07 | 6.81E-03 |
| cg02074316    |                  | 15         | 8.64    | 0.85 | 3.28E-07 | 9.91E-03 |
| cg05638648    | <i>COL18A1</i>   | 21         | 9.50    | 0.90 | 3.26E-07 | 9.91E-03 |
| cg02715072    | <i>TNXB</i>      | 6          | 8.52    | 0.86 | 3.94E-07 | 1.12E-02 |
| cg16283179    | <i>C19orf29</i>  | 19         | 8.06    | 0.84 | 7.88E-07 | 2.09E-02 |
| cg17766828    | <i>C10orf122</i> | 10         | -8.03   | 0.85 | 8.28E-07 | 2.09E-02 |
| cg01012936    | <i>NUAK2</i>     | 1          | 7.89    | 0.86 | 1.03E-06 | 2.33E-02 |
| cg19953917    | <i>SCHIP1</i>    | 3          | 7.92    | 0.84 | 9.77E-07 | 2.33E-02 |
| cg02143936    | <i>MICAL2</i>    | 11         | 7.62    | 0.85 | 1.56E-06 | 3.09E-02 |
| cg13796831    | <i>BAT2L2</i>    | 1          | -7.64   | 0.81 | 1.52E-06 | 3.09E-02 |
| cg19415746    | <i>NRAP</i>      | 10         | 7.67    | 0.81 | 1.45E-06 | 3.09E-02 |
| cg20896439    | <i>GALNTL1</i>   | 14         | 7.51    | 0.85 | 1.85E-06 | 3.50E-02 |
| cg05368730    |                  | 12         | 7.45    | 0.84 | 2.03E-06 | 3.55E-02 |
| ch.22.439136F | <i>C22orf30</i>  | 22         | 7.47    | 0.84 | 1.98E-06 | 3.55E-02 |
| cg00956252    | <i>CLEC16A</i>   | 16         | 7.34    | 0.89 | 2.44E-06 | 4.09E-02 |
| cg01248855    | <i>C17orf42</i>  | 17         | 7.24    | 0.81 | 2.90E-06 | 4.69E-02 |
